# Supplementary material for: The association of host and vector characteristics with Ctenocephalides felis pathogen and endosymbiont infection
Source: PubMed Central journal article supplement (PMC10025546; doi:10.3389/fmicb.2023.1137059), 2023-03-06
Supplement: Image_1.pdf [file Image_1.pdf]

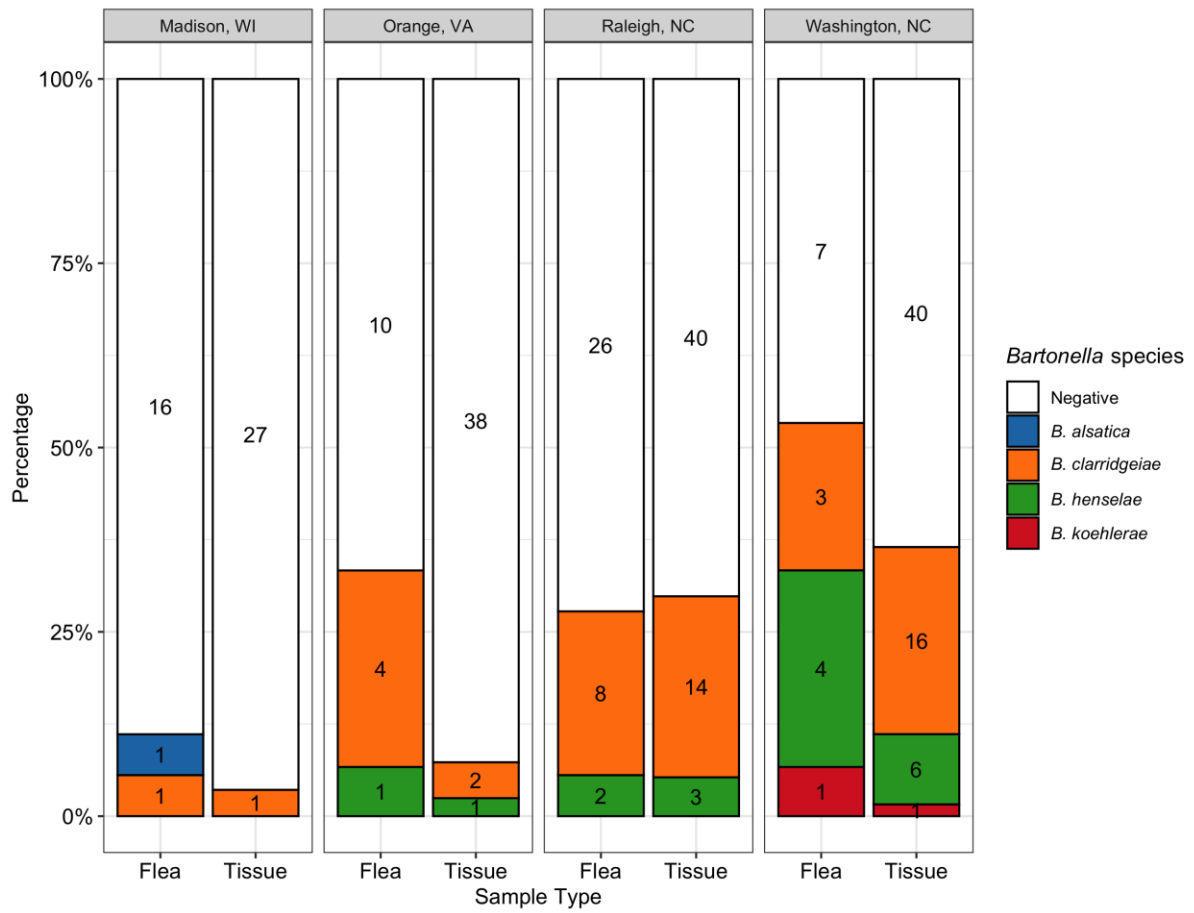

**Supplementary Figure S1** percentage of cats and fleas from each location (x-axis) infected with *Bartonella* spp. (color). The total number of cats or fleas in each category is indicated.
